# Supplementary material
Source: publisher site journal article supplement (https://www.dovepress.com/article/604401)
Supplement: Supplementary file 1 [file 604401%20Revised%20Supplementary%20Materials.docx]

# Appendix 1. Item examples questionnaires

The items, initially formulated in Dutch for the participants, were revised to suit the objectives of this study and translated into English.

## SIS-HCP

You need (therapy) goals. *[name HCP]* …

... explains why specific lifestyle changes are meaningful for me. (autonomy-support)

... provides an overview of possible goals for me and guides me in making a choice. (structure)

... determines which goal I will pursue. Ultimately, *[name HCP]* is the professional expert. (control)

... waits and lets me decide on my own goals. (chaos)

Example question from SIS-HCP.24

## BPNSFS

During the therapy with *[name HCP]*, …

… I feel capable of achieving my therapy goals. (need satisfaction)

… most of the things I do feel like obligations. (need frustration)

Example question from BPNSFS.49

## BREQ-3

I go to therapy because...

… I enjoy my therapy sessions. (intrinsic motivation)

… I consider therapy a fundamental part of who I am. (integrated regulation)

… I find it important to attend my therapy regularly. (identified regulation)

… I feel guilty if I don’t go to my therapy. (introjected regulation)

… I go to therapy because others think I should. (external regulation)

… I don’t see why I should go to my therapy. (amotivation)

Example question from BREQ-3.52

## RAdMAT-NL

During therapy, ...

… I arrive on time for my therapy appointments. (participation/attendance)

… I communicate with *[name HCP]* if I have difficulties with an exercise. (communication)

… I put 100% effort into my therapeutic exercises. (attitude/effort)

Example question from RAdMAT-NL.54

# Supplementary Table 1: Descriptives study variables

|  | **McDonalds ω** | | | | **Min.-Max.** | **M(SD)** | **Md (IQ1-IQ3)** | | **Skewness** | **Kurtosis** |
| --- | --- | --- | --- | --- | --- | --- | --- | --- | --- | --- |
| **(De)motivating interaction styles** (range: 0-5; N = 346) | | | | | | | | | | |
| Motivating | | .91 | | .80 – 5.00 | | 3.85 (.77) | | 3.95 (3.35-4.45) | -.81 | .74 |
| Demotivating | | .84 | | .00 – 4.75 | | 1.73 (.82) | | 1.70 (1.20-2.25) | .33 | .23 |
| Autonomy-support | | .82 | | .90 – 5.00 | | 3.87 (.77) | | 4.00 (3.40-4.48) | -.73 | .60 |
| Structure | | .85 | | .70 – 5.00 | | 3.83 (.82) | | 3.90 (3.30-4.50) | -.83 | .85 |
| Control | | .84 | | .00 – 4.90 | | 1.97 (1.05) | | 2.00 (1.20-2.60) | .22 | -.44 |
| Chaos | | .80 | | .00 – 4.60 | | 1.49 (.90) | | 1.40 (.80-2.08) | .41 | -.26 |
| **Basic Psychological Needs** (range: 1-5; N = 330) | | | | | | | | | | |
| Need satisfaction | | .91 | | 1.25 – 5.00 | | 3.75 (.81) | | 3.83 (3.25-4.38) | -.53 | -.28 |
| Need frustration | | .75 | | 1.00 – 3.33 | | 1.55 (.47) | | 1.42 (1.17-1.83) | .94 | .20 |
| Autonomy satisfaction | | | .76 | 1.00 – 5.00 | | 3.69 (.85) | | 3.75 (3.25-4.25) | -.47 | -.09 |
| Relatedness satisfaction | | | .90 | 1.00 – 5.00 | | 3.57 (1.13) | | 3.75 (2.75-4.50) | -.51 | -.71 |
| Competence satisfaction | | | .74 | 1.00 – 5.00 | | 4.00 (.76) | | 4.00 (3.50-4.50) | -.85 | .53 |
| Autonomy frustration | | | .67 | 1.00 – 4.25 | | 1.78 (.75) | | 1.50 (1.00-2.25) | .96 | .30 |
| Relatedness frustration | | | .51 | 1.00 – 4.00 | | 1.29 (.46) | | 1.00 (1.00-1.50) | 2.08 | 5.65 |
| Competence frustration | | | .67 | 1.00 – 4.00 | | 1.58 (.64) | | 1.25 (1.00-2.00) | 1.02 | .33 |
| **Motivation for therapy** (range: 0-4; N = 335) | | | | | | | | | | |
| Autonomous motivation | | | .86 | .67 – 4.00 | | 2.77 (.76) | | 2.83 (2.25-3.33) | -.47 | -.32 |
| Controlled motivation | | | .57 | .00 – 3.63 | | 1.29 (.69) | | 1.19 (.75-1.88) | .23 | -.37 |
| Intrinsic motivation | | | .90 | .00 – 4.00 | | 2.62 (1.07) | | 2.75 (2.00-3.50) | -.51 | -.50 |
| Integrated regulation | | | .79 | .00 – 4.00 | | 2.59 (1.05) | | 2.75 (1.75-3.50) | -.43 | -.71 |
| Identified regulation | | | .60 | .50 – 4.00 | | 3.09 (.68) | | 3.00 (2.75-3.75) | -.87 | 1.17 |
| Introjected regulation | | | .72 | .00 – 4.00 | | 2.07 (1.08) | | 2.00 (1.25-3.00) | .01 | -.73 |
| External regulation | | | .82 | .00 – 3.75 | | .51 (.79) | | .00 (.00-.75) | 1.97 | 3.60 |
| Amotivation | | | .68 | .00 – 3.50 | | .23 (.53) | | .00 (.00-.06) | 2.85 | 9.19 |
| **Therapy adherence** (range: 1-4; N = 328) | | | | | | | | | | |
| Participation | | .62 | | 2.60 – 4.00 | | 3.77 (.29) | | 3.80 (3.60-4.00) | -1.42 | 1.78 |
| Communication | | .65 | | 1.67 – 4.00 | | 3.44 (.62) | | 3.67 (3.00-4.00) | -1.02 | .34 |
| Attitude | | .89 | | 2.13 – 4.00 | | 3.74 (.39) | | 3.88 (3.63-4.00) | -1.72 | 2.47 |

*Note: N=Number, M=Mean, SD=Standard Deviation, Md=median, IQ=interquartile.*

# Supplementary Table 2: Correlation matrix with exact p-values

|  | **1** | **2** | **3** | **4** | **5** | **6** | **7** | **8** | **9** | **10** | **11** | **12** | **13** | **14** |
| --- | --- | --- | --- | --- | --- | --- | --- | --- | --- | --- | --- | --- | --- | --- |
| **(De)motivating interaction styles** (range: 0-5; N = 346) | | | | | | | | | | | | | | |
| 1. Autonomy-support a | - |  |  |  |  |  |  |  |  |  |  |  |  |  |
| 1. Structure a | .87 (**<.001**) | - |  |  |  |  |  |  |  |  |  |  |  |  |
| 1. Control a | .26 (**<.001**) | .39 (**<.001**) | - |  |  |  |  |  |  |  |  |  |  |  |
| 1. Chaos a | -.14 (**.011**) | -.12 (**.030**) | .40 (**<.001**) | - |  |  |  |  |  |  |  |  |  |  |
| **Basic psychological needs** (range: 1-5; N = 330) | | | | | | | | | | | | | | |
| 1. Need satisfaction a | .47 (**<.001**) | .52 (**<.001**) | .19 (**<.001**) | -.03 (.544) | - |  |  |  |  |  |  |  |  |  |
| 1. Need frustration a | -.27 (**<.001**) | -.30 (**<.001**) | .17 (**.002**) | .24 (**<.001**) | -.20 (**<.001**) | - |  |  |  |  |  |  |  |  |
| **Motivation for therapy** (range: 0-4; N = 335) | | | | | | | | | | | | | | |
| 1. Intrinsic motivation a | .32 (**<.001**) | .35 (**<.001**) | .15 (**.005**) | .04 (.478) | .58 (**<.001**) | -.25 (**<.001**) | - |  |  |  |  |  |  |  |
| 1. Integrated regulation a | .29 (**<.001**) | .30 (**<.001**) | .10 (.060) | -.02 (.693) | .64 (**<.001**) | -.01 (.817) | .40 (**<.001**) | - |  |  |  |  |  |  |
| 1. Identified regulation a | .32 (**<.001**) | .34 (**<.001**) | .09 (.095) | -.09 (.090) | .53 (**<.001**) | -.12 (**.033**) | .47 (**<.001**) | .66 (**<.001**) | - |  |  |  |  |  |
| 1. Introjected regulation a | .20 (**<.001**) | .23 (**<.001**) | .16 (**.003**) | -.06 (.316) | .33 (**<.001**) | .13 (**.017**) | .21 (**<.001**) | .44 (**<.001**) | .52 (**<.001**) | - |  |  |  |  |
| 1. External regulation b | -.18 (**<.001**) | -.15 (**.006**) | .24 (**<.001**) | .30 (**<.001**) | -.13 (**.024**) | .36 (**<.001**) | -.12 (**.033**) | -.12 (**.028**) | -.06 (.302) | .09 (.085) | - |  |  |  |
| 1. Amotivation b | -.14 (**.009**) | -.14 (**.014**) | .21 (**<.001**) | .25 (**<.001**) | -.17 (**.002**) | .30 (**<.001**) | -.21 (**<.001**) | -.19 (**<.001**) | -.28 (**<.001**) | .03 (.614) | .41 (**<.001**) | - |  |  |
| **Therapy adherence** (range: 1-4; N = 328) | | | | | | | | | | | | | | |
| 1. Participationa | .14 (**.011**) | .25 (**<.001**) | .14 (**.014**) | -.05 (.352) | .37 (**<.001**) | -.16 (**.004**) | .22 (**<.001**) | .27 (**<.001**) | .26 (**<.001**) | .19 (**<.001**) | -.07 (.240) | -.05 (.412) | - |  |
| 1. Communicationa | .42 (**<.001**) | .40 (**<.001**) | -.05 (.418) | -.12 (**.030**) | .37 (**<.001**) | -.22 (**<.001**) | .23 (**<.001**) | .24 (**<.001**) | .24 (**<.001**) | .10 (.073) | -.19 (**<.001**) | -.20 (**<.001**) | .13 (**.018**) | - |
| 1. Attitude b | .34 (**<.001**) | .41 (**<.001**) | .12 (**.038**) | -.13 (**.016**) | .49 (**<.001**) | -.25 (**<.001**) | .39 (**<.001**) | .29 (**<.001**) | .37 (**<.001**) | .20 (**<.001**) | -.18 (**.001**) | -.17 (**.002**) | .43 (**<.001**) | .46 (**<.001**) |

N=Number, *anormal distribution, bnon-normal distribution;* values in **bold**=significant correlations (p<.05).

# Supplementary Figure 1: Additional SEM analyses

A: Additional SEM analysis 1 (aggregated interaction styles to motivating and demotivating)
CFI=.91, RMSEA=.04, SRMR=.07
Note: Green arrow = positive relation, red arrow = negative relation.
B: Additional SEM analysis 2 (aggregated interaction styles and types of regulation)

CFI=.94, RMSEA=.04, SRMR=.06

Note: Green arrow = positive relation, red arrow = negative relation.


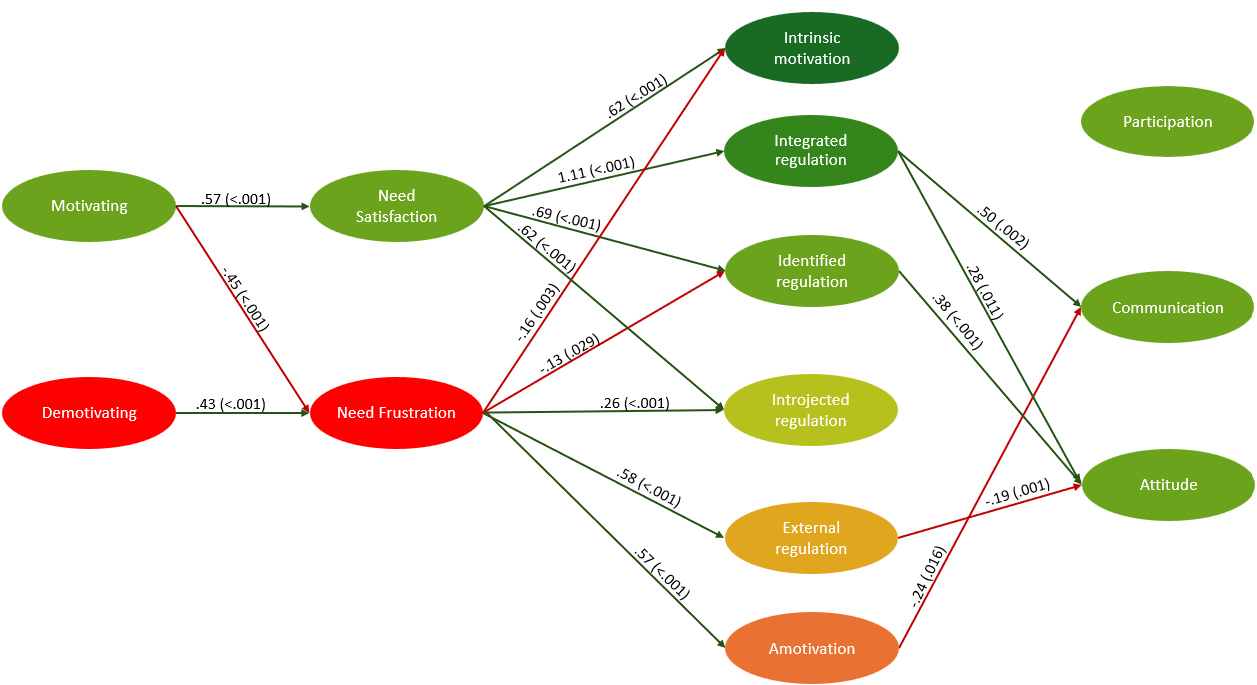
A


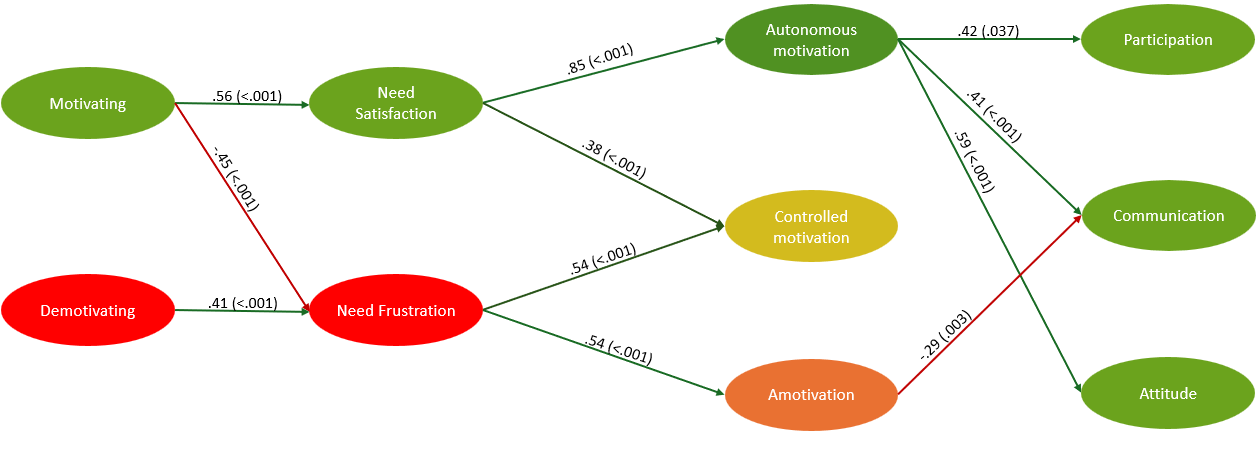
B
